# Supplementary material for: Effect of tourmaline nanoparticles on the anticoagulation and cytotoxicity of poly(l-lactide-co-caprolactone) electrospun fibrous membranes
Source: Royal Society of Chemistry journal article supplement (doi:10.1039/c8ra07700b), 2019-01-01
Supplement: c8ra07700b1.pdf [file c8ra07700b1.pdf]

## Supplementary Information

# Effect of tourmaline nanoparticles on the anticoagulation and cytotoxicity of poly(*L*-lactide-*co*-caprolactone) electrospun fibrous membranes

Tianyu Zhao,<sup>abc</sup> Hong Zhang,<sup>\*abc</sup> Pan Li<sup>abc</sup> and Jinsheng Liang<sup>\*abc</sup>

- a. Key Laboratory of Special Functional Materials for Ecological Environment and Information (Hebei University of Technology), Ministry of Education, Tianjin 300130, China.
- b. Institute of Power Source and Ecomaterials Science, Hebei University of Technology, Tianjin 300130, China.
- c. Key Laboratory for New Type of Functional Materials in Hebei Province, Hebei University of Technology, Tianjin 300130, China.

\*Corresponding author. E-mail: zhanghong@hebut.edu.cn (H. Zhang), liangjinsheng@hebut.edu.cn (J. Liang).

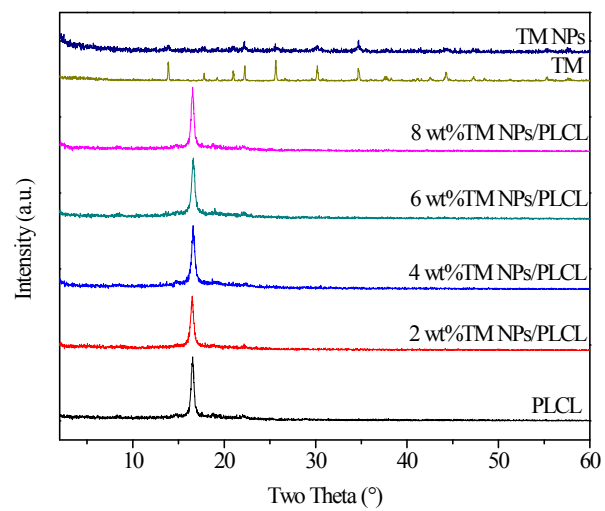

Figure S1. The XRD of TM particles and different membranes (TM NPs, TM, PLCL, 2 wt% TM NPs/PLCL, 4 wt% TM NPs/PLCL, 6 wt% TM NPs/PLCL and 8 wt% TM NPs/PLCL)

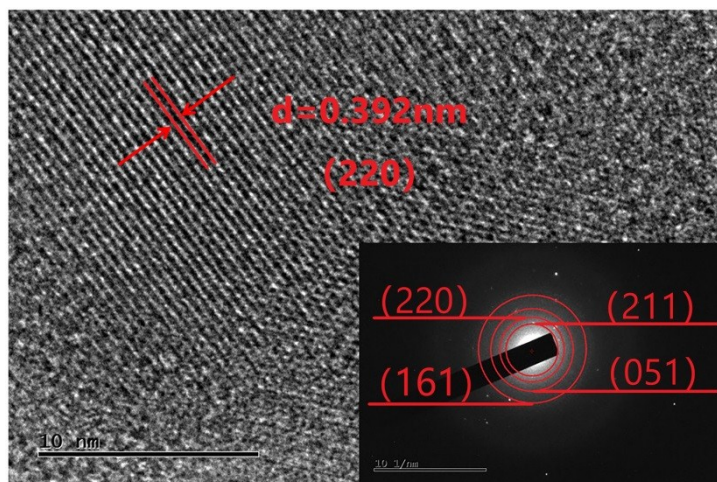

Figure S2. The HRTEM of TM NPs in 8 wt% TM NPs/PLCL membrane

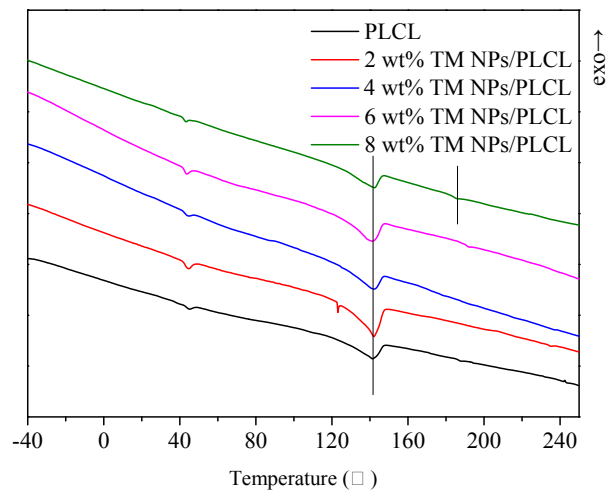

Figure S3. The DSC of different membranes (PLCL, 2 wt% TM NPs/PLCL, 4 wt% TM NPs/PLCL, 6 wt% TM NPs/PLCL and 8 wt% TM NPs/PLCL)

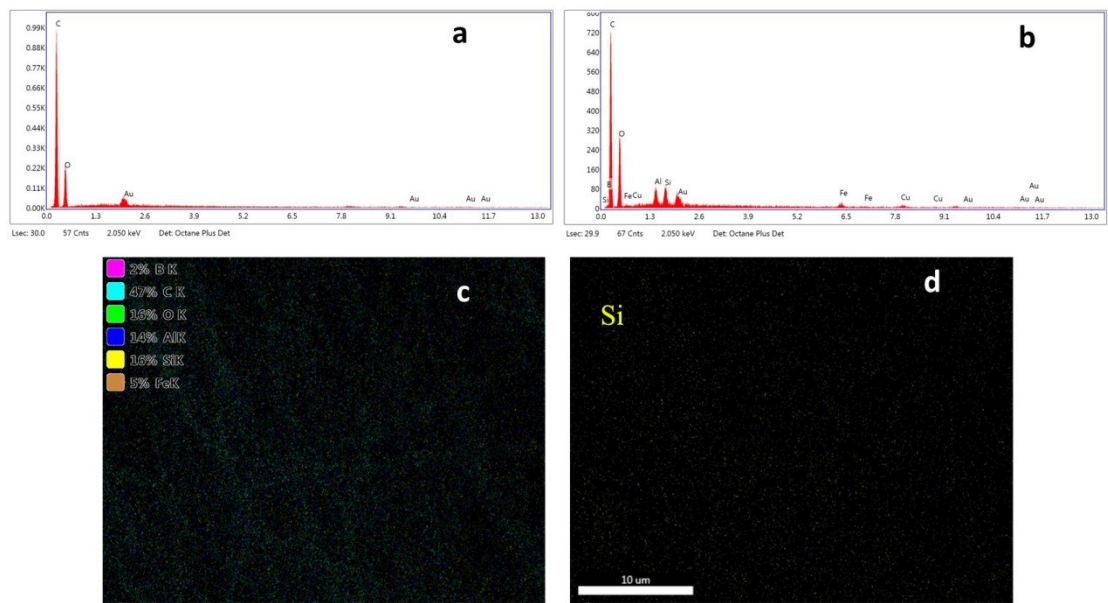

Figure S4 Element analysis of different membranes (a: PLCL; b, c, d: 8 wt% TM NPs/PLCL)

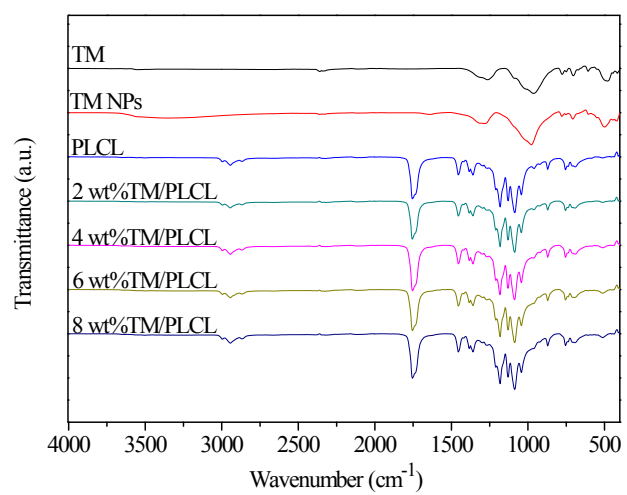

Figure S5 Infrared spectroscopy of TM particles and different electrospun membranes
